1  
2  
3  
4  
5  
6  
7  
8  
9  
10  
11  
12  
13  
14  
15  
16  
17  
18

**Good tutors are not Dear Enemies in Song Sparrows**

**Çağlar Akçay<sup>1</sup>, S. Elizabeth Campbell<sup>2</sup>, Michael D. Beecher<sup>2,3</sup>**

- 1. Department of Biological Sciences, Virginia Tech, Blacksburg, VA 24061
- 2. Department of Psychology, University of Washington, Seattle, WA 98195
- 3. Department of Biology, University of Washington, Seattle, WA 98195

**Author for correspondence:**

Çağlar Akçay  
Department of Biological Sciences  
Virginia Tech  
Blacksburg, VA 24061  
caglar@vt.edu

**Keywords:** song learning, cooperation, communication, aggression, social learning

# Good tutors are not Dear Enemies in Song Sparrows

## Abstract

Bird song is the most widely studied example of vocal learning outside human language and shares important parallels with it, including the importance of social factors during development. Our understanding of social factors in song learning however remains surprisingly incomplete. Here we examine the possible role of aggressive interactions in determining song “tutor” choice in song sparrows (*Melospiza melodia*), a songbird in which individuals display song learning strategies ranging from learning primarily from one tutor, to learning a few songs each from a number of tutors. We test two hypotheses: The Competition hypothesis suggests that young birds learn more from tutors with whom they compete especially intensely and predicts that tutees will respond with high aggression to tutor songs. In contrast the Cooperation hypothesis suggests that song learning reflects a cooperative relationship between the tutor and the tutee and predicts low aggressive response to tutors. In a playback experiment we found that birds respond more aggressively to songs of their tutors than they do to songs of strangers and strength of aggressive response correlated positively with how much they had learned from that tutor. These results provide the first field evidence that young songbirds show increased aggression to tutor songs, supporting the hypothesis that young males learn from adult males with whom they most intensely compete during the song-learning phase, and perhaps afterwards.

## Introduction

Although vocal communication is ubiquitous in the animal kingdom, social learning of vocal signals is limited to a few taxa, including humans (but not other primates), cetaceans, bats, elephants and three orders of birds (Baptista & Schuchmann, 1990; Boughman, 1998; Marler & Tamura, 1964; Pepperberg, 1994; Reiss & McCowan, 1993). Of these, bird song in songbirds is the best studied system next to human language (Beecher & Brenowitz, 2005; Catchpole & Slater, 2008).

Early studies showed striking parallels between the development of vocal signals in humans and songbirds including an early sensitive period, a predisposition to learn conspecific vocalizations, a babbling (or subsong) stage, and the necessity of auditory feedback for normal development (Marler, 1970). Another parallel is that vocal development in both humans and songbirds is a social process. Although the social aspect of vocal development is obvious for humans, the potent role of social interactions in song learning was not fully appreciated until laboratory studies used live birds as song “tutors” rather than recorded song as had been conventional (Baptista & Petrinovich, 1984, 1986). Although it is now widely accepted that song learning is a social process in which young birds (tutees) hear and engage in interactions with adults (tutors), there is a dearth of studies on identifying the critical social factors influencing song learning (Beecher, 2008).

Despite the many striking parallels between human and songbird vocal learning, the key social factors in vocal learning may be quite different for the two taxa. In particular, whereas the tutor-tutee (teacher-student) relationship in humans is clearly a cooperative one, with both parties typically related, the common case in songbirds is that tutor and tutee are unrelated competitors.

This is because most songbirds commence song-learning only after they disperse from their natal area, and thus their song tutors are not their fathers. Species where fathers act as song tutors for their sons are rare (Grant & Grant, 1996; Greig, Taft, & Pruett-Jones, 2012; Immelmann, 1969). Instead most songbirds song tutors are unrelated adults some of whom will be their territorial competitors come the next breeding season (Beecher & Brenowitz, 2005; Brenowitz & Beecher, 2005). This point can be illustrated with song sparrows living in Washington State (Beecher, 2017). In this population, song learning occurs in the period after natal dispersal and before the bird's first breeding season the following spring. Neighbors typically 'share' song types, and this song sharing has been shown to be a result of song learning (Beecher, 2008; Beecher, Campbell, & Stoddard, 1994; Nordby, Campbell, & Beecher, 1999). The period of song learning also coincides with territory establishment during which young birds also engage in aggressive interactions with their future neighbors (Arcese, 1989; Nice, 1943), and shared songs are used by adult birds as part of a graded signaling system in aggressive interactions (Akçay, Tom, Campbell, & Beecher, 2013; Burt, Campbell, & Beecher, 2001). All of these lines of evidence suggest that song learning may be influenced by the amount of aggressive and competitive interactions between the tutors and the young birds. We term this hypothesis the "*Competition*" hypothesis.

A different line of thinking, however, suggests that even under these circumstances the songbird tutor-tutee relationship could be an at least partially cooperative one. As has been shown for numerous diverse taxa, territorial neighbors often enter into a 'Dear Enemy' relationship where they are more tolerant of their neighbors than they are of strangers (Akçay et al., 2009; Fisher, 1954; Temeles, 1994). Hence it is possible that it might actually benefit an established territorial adult to 'teach' his songs to a young bird who is in a position to become his future neighbor; in

short, a ‘dear tutor-tutee’ relationship could underlie and support a ‘dear enemy’ relationship. This idea can be seen as an extension of the observation that that in many group-living species with vocal learning (e.g. dolphins, parrots and cooperatively breeding songbirds), vocal learning seems to have an affiliative function in which individuals learn their vocalizations from members of their social groups (Akçay, Hambury, Arnold, Nevins, & Dickinson, 2014; Berg, Delgado, Cortopassi, Beissinger, & Bradbury, 2012; Brown, Farabaugh, & Veltman, 1988; Price, 1998; Sharp, McGowan, Wood, & Hatchwell, 2005). This “*Cooperation*” hypothesis is also consistent with recent reviews of animal ‘teaching’ in which the putative tutor does not obtain immediate benefits (and may even pay immediate costs) by engaging in the teaching of a tutee (Hoppitt et al., 2008). Under this view, older birds would reap some form of delayed benefit from tutoring young birds and having them as neighbors, such as increased breeding success (Beletsky & Orians, 1989), access to extra-pair females that are mated to the young males or less competition for within-pair paternity from these young males (Hill, Akçay, Campbell, & Beecher, 2011).

Here we present a test of competition and cooperation hypotheses in song sparrows. Song sparrows are close-ended learners who learn their songs in the period after dispersal from the natal area and the beginning of their first breeding season the following spring and do not change their song repertoire in subsequent years (Nordby, Campbell, & Beecher, 2002). Extensive field studies have shown that while on average a bird copies about half of his 8 or 9 songs from a single tutor (the best tutor) and the rest from multiple other tutors, there is a range of learning strategies, varying from copying all your songs from a single tutor to copying a single song from each of 8 or 9 tutors (Akçay, Campbell, Reed, & Beecher, 2014; Beecher et al., 1994; Nordby et al., 1999; Nordby, Campbell, & Beecher, 2007). As noted above, adult song sparrows use shared songs as part of a graded signaling system which may indicate the primary role of competitive

interactions in song learning. At the same time, multiple studies have shown that male song sparrows can individually recognize their neighbors and generally show reduced aggression to neighbors compared to strangers (Akçay, Reed, Campbell, Templeton, & Beecher, 2010; Akçay et al., 2009; Wilson & Vehrencamp, 2001), suggesting the opportunity for cooperative interactions with potential tutors exists.

We tested the two hypotheses by asking whether a bird would be respond more or less aggressively to a simulated intrusion by a former tutor compared to a stranger, and whether aggressive response would vary with how much the young bird had learned from the tutor. Specifically, in a playback experiment with known song learning histories, we compared their aggressive response to the tutor from whom they had learned the most, to their aggressive response to songs from a stranger. The cooperation hypothesis predicts that tutees should respond *less* aggressively to their best tutors than to strangers, and less aggressively to tutors from whom they learned more than from tutors from whom they learned less. In contrast, the competition hypothesis predicts precisely the opposite: subjects should respond *more* aggressively to their best tutors than to strangers, and more aggressively to tutors from whom they learned more than from tutors from whom they learned less.

## Methods

### (a) Study site and subjects

We studied a banded population of song sparrows in Discovery Park, Seattle, Washington, USA. Between 2009 and 2014 all the territorial males (about ~120 males each year) were banded with a US Fish and Wildlife Service metal band and three colored bands. As a part of our long term study on song learning (Beecher, 2008), the complete song repertoire of each male was also

recorded with Marantz PMD 660 recorders and Sennheiser ME66/K6 shot-gun microphones. The full repertoire was considered to be recorded fully after at least 16 song switches (Nordby et al., 1999). Subjects in the playback experiment were 13 banded and recorded male song sparrows in our study population in Discovery Park, Seattle, Washington, USA. We tested each subject twice on different days with a counterbalanced order for two trial types.

# **(b) Tracing song learning**

We chose males with known ages and song learning histories that held territories in Spring 2014. Three of the subjects hatched in 2009, 6 in 2010 and 7 in 2011. All the subjects were banded either in juvenile plumage before their first molt or singing plastic song before their first Spring when the songs crystallize (around March 1<sup>st</sup>). We made sonagrams of all the songs in the repertoire of the tutees and potential tutors using Syrinx ([www.syrinxpc.com](http://www.syrinxpc.com), John Burt, Seattle, WA). We printed out several variations of each song of all the males. The tutors for each tutee were determined as described in detail in our previous studies (Akçay, Campbell, Reed, et al., 2014; Nordby et al., 1999). Three judges visually compared the songs of the tutees and tutors independently and laid out matching songs on a large table. After this step, the three judges discussed their best match decisions, and arrived at a consensus sheet. If a single adult had the best matching song for a given tutee song, that tutor got a credit of 1 for that song. If more than one adult had equivalently good matches for a given tutee song, then each tutor got credit of 1/N, where N was the number of tutors with equally good matching songs. Because of the high level of song sharing in our population (Hill, Campbell, Nordby, Burt, & Beecher, 1999) splitting credit between multiple tutors happens about half the time (Akçay, Campbell, Reed, et al., 2014).

# **(c) Design and stimuli**

Subjects were tested with two songs each from 1) the male with the highest tutoring score for that bird (the bird's 'best' tutor) and 2) a stranger male that held a territory at 1 to 2 km from the territory of the subject. In all cases the best tutor was no longer present in the study area, most likely to due to death as territorial males do not make significant moves (Akçay, Campbell, & Beecher, 2015; Arcese, 1989). Previous research in other songbirds has shown that males remember and recognize their territorial neighbors even after these disappear (Godard, 1991; McGregor & Avery, 1986). We therefore expected that subjects would be able to recognize these birds that had disappeared but had once been their tutor-neighbors.

We carried out the playbacks at the center of the subjects' territories to have a standardized location for contrasting responses to strangers vs. tutors. Previous studies have shown no difference in response strength between stranger playback and a randomly chosen neighbor (Searcy, McArthur, Peters, & Marler, 1981; Stoddard, Beecher, Horning, & Campbell, 1991). We reasoned therefore that getting a difference in response strength to tutors compared to strangers in either direction would be stronger test of the alternative hypotheses. We note also that since the tutors had disappeared by the time of the playbacks, and therefore were no longer neighbors with the subject, there was no shared boundary between subjects and best tutors.

The stimuli for the best tutors were chosen from the songs they shared with the tutee (i.e. from the songs that the tutee had learned from the tutor). Stranger songs were non-shared with the subject (as stranger songs almost always are). Playback tapes were created in Syrinx so that stimulus songs would be presented every ten seconds.



#### **(d) Playback procedure**

Each subject was tested twice, once with the song of his best tutor and once with the song of a stranger song on different days not farther apart than 1 week. The order was counterbalanced across subjects. We started each trial by setting up a speaker (iMainGo, Portable Sound Laboratories, Inc) at the center of the subject's territory. The speaker was connected to an iPod with a 20 m cable. The stimuli were played at approximately 80 dB SPL, measured at 1 m (Radio Shack 33-2055 sound meter), corresponding to normal broadcast song amplitude. Two observers recorded the behavior of the subject using the same recording equipment as above. Three minutes after the first sighting of the subject, we switched to the second song type and carried on the trial for another three minutes.

#### **(e) Response measures and data analyses**

From the trial recordings we extracted the following response measures: duration of the trial (from first sighting of the male to the last playback), number of flights, time spent within 5m of speaker, closest approach to the speaker. The numbers of flights and songs were converted to rates per minute to account for unequal duration of observation across trials due to different latencies to respond.

We use rate of flights, proportion of trial spent within 5m and closest approach distance (as our primary variables of aggression. As these variables were highly correlated with each other we used a principal component analysis (PCA, unrotated, correlation matrix) to arrive at a single aggression score (see the correlation matrix in Table 1). Our previous studies with taxidermic mounts indicate that aggression scores calculated from these measures reliably predict attack (Akçay, Campbell, & Beecher, 2014; Akçay et al., 2013). These three behaviors also constitute

an “evolutionary character” (Araya-Ajoy & Dingemanse, 2014) corresponding to aggressiveness in this species (Akçay et al., 2015). The first component of the PCA explained 73.6% of the variance and we took these scores as the aggression scores (see Table 1 for coefficients). Higher aggression scores meant higher levels of aggressive response. We then ran a mixed ANOVA on the aggression scores with the condition as a within-subject factor and proportion learned from best tutor as a between subject covariate.

Table 1. Correlation coefficients (p-values) between aggressive behaviors and the loading coefficients on the PCA (rightmost column).

|                                     | flights<br>(per<br>minute) | proportion of<br>time within<br>5m | closest<br>approach to<br>speaker | loading<br>coefficients<br>for PCA1 |
|-------------------------------------|----------------------------|------------------------------------|-----------------------------------|-------------------------------------|
| <b>flights (per minute)</b>         | -                          | 0.55 (0.004)                       | -0.49 (0.01)                      | 0.52                                |
| <b>proportion of time within 5m</b> | -                          | -                                  | -0.75 (<0.0001)                   | 0.61                                |
| <b>closest approach to speaker</b>  | -                          | -                                  | -                                 | -0.6                                |

## Results

Repertoire sizes of subjects ranged from 6 to 12 song types with a mean of 9.15. The number of tutors for each tutee ranged from 1 to 7. On average, the best tutors accounted for 48% of the songs in the repertoires of the tutees (range: 15% to 83.3%).

Subjects responded more strongly to tutor playback than to stranger playback ( $F_{1,11} = 13.61$ ,  $p = 0.004$ , Figure 1). 12 out of 13 subjects for whom we had both trials responded more aggressively to the tutor than to the stranger. There was no main effect of proportion of the song repertoire learned from the best tutor ( $F_{1,11} = 0.03$ ,  $p = 0.88$ ) but there was a significant interaction between proportion of song repertoire learned from best tutor and condition (i.e. tutor vs. stranger),  $F_{1,11} =$

211 5.93,  $p = 0.03$ . The more the tutee had learned from the best tutor, the more aggressive was his  
 212 response to that bird's song compared to his response to the stranger song (Figure 2).

213 Figure 1. Aggression scores in stranger vs. tutor trials for individual subjects.

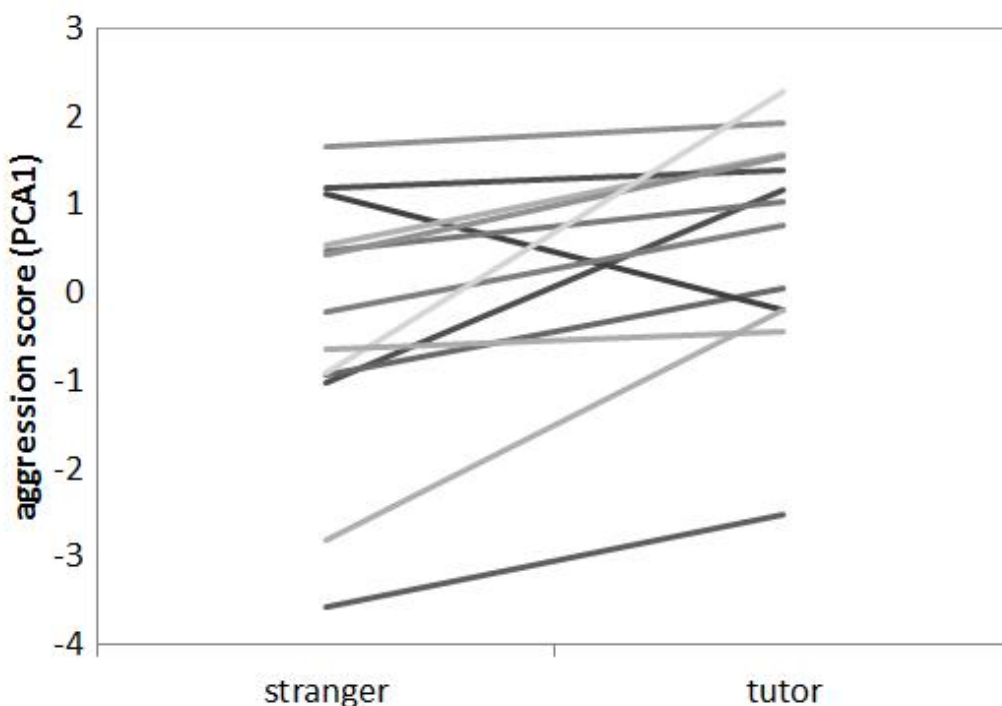

214

Figure 2. The difference in aggression scores between best tutor and stranger trials for individual subjects depending on the proportion of songs they learned from their best tutor.

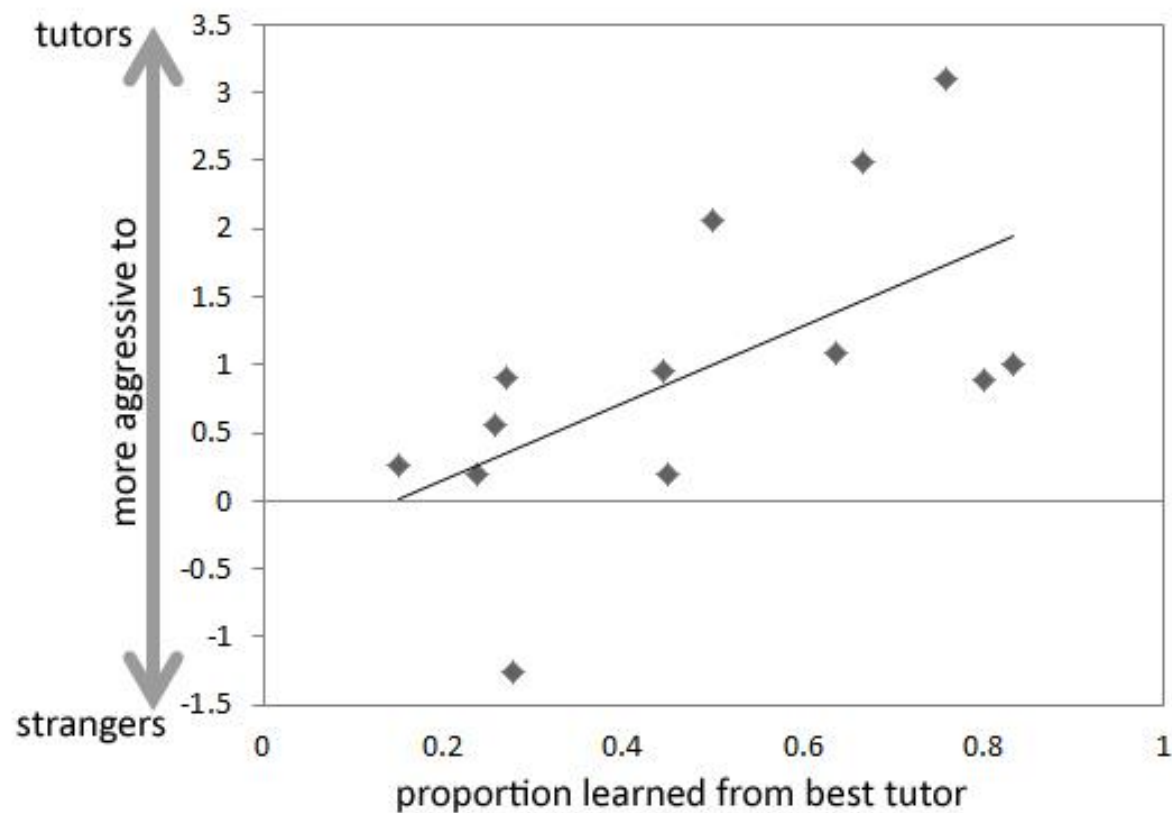

## Discussion

We observed two effects in this experiment. First, subjects responded more aggressively to simulated intrusions by their former best tutors than to those of strangers. Second, the difference in response strength to tutors vs. stranger was larger the more songs the subject had learned from that tutor. These results support the competition hypothesis which predicted that tutors will elicit a higher response than strangers and strength of response will depend on the degree of song learning from that tutor. Below, we first discuss and critically evaluate some alternative explanations before discussing the implications of these results for the role of social interactions during song learning.

Previous studies by our group and others with song sparrows in both western and eastern populations put the present findings in a fuller context and rule out certain alternative interpretations. One possible interpretation of the first effect is that birds respond more strongly to shared song than to unshared song. Two previous studies however found that song sparrows did not respond more aggressively to own (self) song, which by definition is shared compared to stranger (i.e. non-shared) song (McArthur, 1986; Searcy et al., 1981). In a more direct test, we also failed to detect differences in responses to shared vs. non-shared stranger songs (Akçay, McKune, Campbell and Beecher, in preparation). These results show that song sparrows do not in general respond more aggressively to shared songs compared to non-shared songs, eliminating this alternative explanation.

A second alternative explanation for a stronger response to tutors compared to strangers is that birds respond more strongly to local songs from tutors that used to hold territories close to subjects compared to stranger songs coming from birds that lived further away. However, such discrimination is typically seen only over much larger distances than those involved in our study: in Searcy and colleagues' study of eastern song sparrows (Searcy, Nowicki, Hughes, & Peters, 2002), discrimination was achieved only for non-local songs from 540 km away. In our experiment, stranger songs were taken from birds within 2 km of the subject. Furthermore, previous studies in our population have shown that while song sparrows are less aggressive to their neighbors when these are simulated singing at the appropriate territory boundary compared to strangers (the quintessential Dear Enemy effect), they responded equally aggressively to neighbors and strangers when the playbacks were carried out at the center of the territory (as in the present experiment) or at an inappropriate boundary (Stoddard et al., 1991; Stoddard, Beecher, Horning, & Willis, 1990). Overall, these studies suggest that song sparrows respond

equally strongly to strangers and neighbors at the territory center, unless the strangers come from very distant populations. Therefore, the fact that tutor territories tended to be closer to the subjects' territories than the strangers' cannot explain the fact that the subject responded more strongly to the tutors compared to strangers.

Given the context of these previous studies, our finding that subjects responded more strongly to tutor song than stranger song, with this difference being larger the more they had learned from the tutor, suggests that neighbors regarded the intrusion by the tutor-neighbor as a higher threat than even that by a stranger. As such the results imply tutors and tutees are not in a cooperative relationship. These results are the first field study to indicate that birds recognize their former best tutors and that their learning history is reflected in their aggressive response to these tutors.

Note that there is a third hypothesis that might be confused with the Competition hypothesis but is in fact distinct from it. We call it simply the *Aggression hypothesis*, which states that the young birds learn the most songs from birds that are most aggressive. In some cases, it is further assumed that birds who are more aggressive are superior in quality than those birds who are less aggressive. We have done two previous studies that found no support this hypothesis. In the first study (Akçay, Campbell, & Beecher, 2014; Akçay, Campbell, Reed, et al., 2014) we measured aggressiveness in adult birds in our study population and found it highly repeatable but unable to explain any of the variance in the 'tutoring success' of these birds in one year: young song sparrows did not learn more songs from tutors who were generally more aggressive. In the second study (Akçay et al., 2015), we compared the survival rates of birds who varied in aggressiveness and found that on average more aggressive birds do not survive longer on territory than do less aggressive birds. To be clear, the Competition hypothesis refers to a background of aggressive interactions between a specific tutor and a specific tutee, while the

Aggression hypothesis refers specifically to the general effects on song tutoring of the general aggressiveness (across time and across contexts) of birds who are song tutors in the population.

# *Implications for the function of song learning*

One interpretation of the result that the aggressive response to tutors co-varied positively with the amount of learning from that tutor is that young males learn more from tutors with whom they engage in more aggressive interactions. This can be considered an adaptive learning strategy given what we know about the function of song in aggressive interactions in song sparrows.

Extensive field studies in our population have revealed that shared songs with neighbors are used in a graded and hierarchical signaling system (Beecher, Campbell, Burt, Hill, & Nordby, 2000; Burt et al., 2001; Searcy, Akçay, Nowicki, & Beecher, 2014). In particular, shared songs are used in two ways: as a ‘song type match’ when they are sung in response to a neighbor singing the same song type (Beecher et al., 2000) and as a ‘repertoire match’, when they are sung in response to a neighbor singing a different but still shared song type (Beecher, Stoddard, Campbell, & Horning, 1996). These signals indicate different levels of aggressive intention, with type matching being a reliable signal indicating willingness to escalate and eventually attack (Akçay et al., 2013; Burt et al., 2001) and repertoire matching being an intermediate signal indicating attention to the opponent’s singing but not a direct escalation. Non-shared songs are used to indicate unwillingness to continue the interaction (Beecher & Campbell, 2005). These graded signals are used in a hierarchical way such that type matching is followed by higher level threat signals such as soft songs and wing waves, and eventually physical attack if the opponent does not back down, as he could by switching to a different song type (Akçay et al., 2013; Burt et al., 2001).

Given these functions of shared songs in aggressive interaction, it is likely adaptive for young males to maximize their repertoire overlap with the adults they most often interact with aggressively. Such a strategy would allow them to mediate aggressive interactions using shared song and potentially avoid getting into physical aggression that could be costly to both parties. On the flip-side, if birds interact with multiple neighbors aggressively throughout song learning, the birds may try to overlap their song repertoire with multiple tutors by learning one or two songs from each.

A significant caveat to the present results is that they are still only indirect support for the Competition hypothesis since we did not track every interaction between tutees and potential tutors during song learning. Ideally, we would want to observe the direct aggressive interactions between the tutors and tutees during the period of song learning, although previous attempts by our group using extensive radio-tracking failed to yield significant amounts of aggressive interactions between young birds and potential tutors (Templeton, Reed, Campbell, & Beecher, 2012). Nevertheless, detailed field studies have shown that new birds often do engage in repeated aggressive interactions with territory owners in order to carve out their own territory (Arcese, 1989; Nice, 1943). It is possible that intense aggressive interactions mostly happen in a limited time frame when the young bird first establishes his territory, which in our population can happen anytime between their first Summer (as early as July and August) and the following Spring (as late as May). More detailed studies are needed, particularly ones that would take advantage of automated tracking systems that can monitor tutors and tutees around the clock for extended periods of time (e.g. Rutz et al., 2012). Such automated systems could be used to detect when territories are first established and to quantify how many interactions the young birds have



317 with their neighbors during this period. Until then, the present results are necessarily tentative in  
318 supporting the competition hypothesis.

319

320

# References

- Akçay, Ç., Campbell, S. E., & Beecher, M. D. (2014). Individual differences affect honest signaling in a songbird. *Proceedings of the Royal Society of London, Series B: Biological Sciences*, 281, 20132496.
- Akçay, Ç., Campbell, S. E., & Beecher, M. D. (2015). The fitness consequences of honesty: under-signalers have a survival advantage in song sparrows. *Evolution*, 69, 3186-3193.
- Akçay, Ç., Campbell, S. E., Reed, V. A., & Beecher, M. D. (2014). Song sparrows do not learn more songs from aggressive tutors. *Animal Behaviour*, 94, 151-159.
- Akçay, Ç., Hambury, K. L., Arnold, J. A., Nevins, A. M., & Dickinson, J. L. (2014). Song sharing with neighbours and relatives in a cooperatively breeding songbird. *Animal Behaviour*, 92, 55-62.
- Akçay, Ç., Reed, V. A., Campbell, S. E., Templeton, C. N., & Beecher, M. D. (2010). Indirect reciprocity: song sparrows distrust aggressive neighbors based on eavesdropping. *Animal Behaviour*, 80, 1041- 1047.
- Akçay, Ç., Tom, M. E., Campbell, S. E., & Beecher, M. D. (2013). Song type matching is an honest early threat signal in a hierarchical animal communication system. *Proceedings of the Royal Society of London, Series B: Biological Sciences*, 280, 20122517. doi: <http://dx.doi.org/10.1098/rspb.2012.2517>
- Akçay, Ç., Wood, W. E., Searcy, W. A., Templeton, C. N., Campbell, S. E., & Beecher, M. D. (2009). Good neighbour, bad neighbour: song sparrows retaliate against aggressive rivals. *Animal Behaviour*, 78(1), 97-102.
- Araya-Ajoy, Y. G., & Dingemanse, N. J. (2014). Characterizing behavioural ‘characters’: an evolutionary framework. *Proceedings of the Royal Society of London, Series B: Biological Sciences*, 281(1776), 20132645.

345    Arcese, P. (1989). Territory acquisition and loss in male song sparrows. *Animal Behaviour*,  
346            37(Part 1), 45-55.

347    Baptista, L. F., & Petrinovich, L. (1984). Social interaction, sensitive phases and the song  
348            template hypothesis in the white-crowned sparrow. *Animal Behavior*, 32, 172-181.

349    Baptista, L. F., & Petrinovich, L. (1986). Song development in the white-crowned sparrow:  
350            Social factors and sex differences. *Animal Behaviour*, 34(5), 1359-1371.

351    Baptista, L. F., & Schuchmann, K. L. (1990). Song learning in the Anna hummingbird (Calypte  
352            anna ). *Ethology*, 84(1), 15-26.

353    Beecher, M. D. (2008). Function and mechanisms of song learning in song sparrows. *Advances*  
354            *in the study of behavior*, 38, 167-225.

355    Beecher, M. D. (2017). Birdsong learning as a social process. *Animal Behaviour*. doi:  
356            <http://dx.doi.org/10.1016/j.anbehav.2016.09.001>

357    Beecher, M. D., & Brenowitz, E. A. (2005). Functional aspects of song learning in birds. *Trends*  
358            *in Ecology & Evolution*, 20, 143-149.

359    Beecher, M. D., & Campbell, S. E. (2005). The role of unshared songs in singing interactions  
360            between neighbouring song sparrows. *Animal Behaviour*, 70, 1297-1304.

361    Beecher, M. D., Campbell, S. E., Burt, J. M., Hill, C. E., & Nordby, J. C. (2000). Song type  
362            matching between neighboring song sparrows. *Animal Behavior*, 59, 21-27.

363    Beecher, M. D., Campbell, S. E., & Stoddard, P. K. (1994). Correlation of song learning and  
364            territory establishment strategies in the song sparrow. *Proceedings of the National*  
365            *Academy of Sciences, USA*, 91, 1450-1454.

366    Beecher, M. D., Stoddard, P. K., Campbell, S. E., & Horning, C. L. (1996). Repertoire matching  
367            between neighbouring song sparrows. *Animal Behaviour*, 51(4), 917-923.

- Beletsky, L. D., & Orians, G. H. (1989). Familiar Neighbors Enhance Breeding Success in Birds. *Proceedings of the National Academy of Science*, 86 7933-7936.
- Berg, K. S., Delgado, S., Cortopassi, K. A., Beissinger, S. R., & Bradbury, J. W. (2012). Vertical transmission of learned signatures in a wild parrot. *Proceedings of the Royal Society B-Biological Sciences*, 279(1728), 585-591. doi: 10.1098/rspb.2011.0932
- Boughman, J. W. (1998). Vocal learning by greater spear-nosed bats. *Proceedings of the Royal Society of London. Series B: Biological Sciences*, 265(1392), 227-233.
- Brenowitz, E. A., & Beecher, M. D. (2005). Song learning in birds: diversity and plasticity, opportunities and challenges. *Trends Neurosci*, 28(3), 127-132.
- Brown, E. D., Farabaugh, S. M., & Veltman, C. J. (1988). Song sharing in a group-living songbird, the Australian magpie, *Gymnorhina tibicen*: Part I. Vocal sharing within and among social groups. *Behaviour*, 104(1-2), 1-28.
- Burt, J. M., Campbell, S. E., & Beecher, M. D. (2001). Song type matching as threat: a test using interactive playback. *Animal Behaviour*, 62(1163-1170).
- Catchpole, C. K., & Slater, P. J. B. (2008). *Bird song: biological themes and variations*. Cambridge, UK: Cambridge University Press.
- Fisher, J. B. (1954). Evolution and bird sociality. In J. Huxley, A. C. Hardy & E. B. Ford (Eds.), *Evolution as process* (pp. 71-83). London: Allen & Unwin.
- Godard, R. (1991). Long-term memory of individual neighbors in a migratory songbird. *Nature*, 350, 228-229.
- Grant, B. R., & Grant, P. R. (1996). Cultural inheritance of song and its role in the evolution of Darwin's finches. *Evolution*, 50, 2471-2487

- Greig, E. I., Taft, B. N., & Pruett-Jones, S. (2012). Sons learn songs from their social fathers in a cooperatively breeding bird. *Proceedings of the Royal Society B: Biological Sciences*, 279(1741), 3154-3160.
- Hill, C. E., Akçay, Ç., Campbell, S. E., & Beecher, M. D. (2011). Extrapair paternity, song and genetic quality in song sparrows. *Behavioral Ecology*, 22, 73-81.
- Hill, C. E., Campbell, S. E., Nordby, J. C., Burt, J. M., & Beecher, M. D. (1999). Song sharing in two populations of song sparrows (*Melospiza melodia*). *Behavioral Ecology and Sociobiology*, 46, 341-349.
- Hoppitt, W. J., Brown, G. R., Kendal, R., Rendell, L., Thornton, A., Webster, M. M., & Laland, K. N. (2008). Lessons from animal teaching. *Trends in Ecology & Evolution*, 23(9), 486-493.
- Immelmann, K. (1969). Song development in the zebra finch and other estrildid finches. In R. A. Hinde (Ed.), *Bird vocalizations: their relation to current problems in biology and psychology* (pp. 61-74). London: Cambridge Univ. Press.
- Marler, P. (1970). Birdsong and speech development: could there be parallels? *American Scientist*, 58, 669-673.
- Marler, P., & Tamura, M. (1964). Culturally transmitted patterns of vocal behavior in sparrows. *Science*, 146, 1483-1486.
- McArthur, P. D. (1986). Similarity of playback songs to self song as a determinant of response strength in song sparrows (*Melospiza melodia* ). *Animal Behaviour*, 34(1), 199-207.
- McGregor, P. K., & Avery, M. I. (1986). The unsung songs of great tits (*Parus major*): Learning neighbours' songs for discrimination. *Behavioral Ecology and Sociobiology*, 18(4), 311-316.

413 Nice, M. M. (1943). Studies in the life history of the song sparrow II. The behavior of the song  
414 sparrow and other passerines. *Transactions of the Linnean Society of New York*, 6, 1-328.

415 Nordby, J. C., Campbell, S. E., & Beecher, M. D. (1999). Ecological correlates of song learning  
416 in song sparrows. *Behavioral Ecology*, 10, 287-297.

417 Nordby, J. C., Campbell, S. E., & Beecher, M. D. (2002). Adult Song Sparrows do not Alter  
418 their Song Repertoires. *Ethology*, 108(1), 39-50.

419 Nordby, J. C., Campbell, S. E., & Beecher, M. D. (2007). Selective attrition and individual song  
420 repertoire development in song sparrows. *Animal Behavior*, 74, 1413-1418.

421 Pepperberg, I. M. (1994). Vocal learning in grey parrots (*Psittacus erithacus*): effects of social  
422 interaction, reference, and context. *Auk*, 300-313.

423 Price, J. J. (1998). Family-and sex-specific vocal traditions in a cooperatively breeding songbird.  
424 *Proceedings of the Royal Society of London. Series B: Biological Sciences*, 265(1395),  
425 497-502.

426 Reiss, D., & McCowan, B. (1993). Spontaneous vocal mimicry and production by bottlenose  
427 dolphins (*Tursiops truncatus*): Evidence for vocal learning. *Journal of Comparative*  
428 *Psychology*, 107(3), 301.

429 Rutz, C., Burns, Z. T., James, R., Ismar, S. M. H., Burt, J., Otis, B., . . . St Clair, J. J. H. (2012).  
430 Automated mapping of social networks in wild birds. *Current Biology*, 22(17), R669-  
431 R671.

432 Searcy, W. A., Akçay, Ç., Nowicki, S., & Beecher, M. D. (2014). Aggressive Signaling in Song  
433 Sparrows and Other Songbirds. *Advances in the Study of Behavior*, 46, 89-125.

434 Searcy, W. A., McArthur, P. D., Peters, S. S., & Marler, P. (1981). Response of Male Song and  
435 Swamp Sparrows to Neighbour, Stranger, and Self Songs. *Behaviour*, 77, 152-163.

- Searcy, W. A., Nowicki, S., Hughes, M., & Peters, S. (2002). Geographic song discrimination in relation to dispersal distances in song sparrows. *The American Naturalist*, 159, 221-230.
- Sharp, S. P., McGowan, A., Wood, M. J., & Hatchwell, B. J. (2005). Learned kin recognition cues in a social bird. *Nature*, 434(7037), 1127-1130.
- Stoddard, P. K., Beecher, M. D., Horning, C. L., & Campbell, S. E. (1991). Recognition of individual neighbors by song in the song sparrow, a species with song repertoires. *Behavioral Ecology and Sociobiology*, 29(3), 211-215.
- Stoddard, P. K., Beecher, M. D., Horning, C. L., & Willis, M. S. (1990). Strong neighbor-stranger discrimination in song sparrows. *Condor*, 92, 1051-1056.
- Temeles, E. J. (1994). The role of neighbors in territorial systems: when are they 'dear enemies'? *Animal Behavior*, 47, 339-350.
- Templeton, C. N., Reed, V. A., Campbell, S. E., & Beecher, M. D. (2012). Spatial movements and social networks in juvenile male song sparrows. *Behavioral Ecology*, 23(1), 141-152.
- Wilson, P. L., & Vehrencamp, S. L. (2001). A test of the deceptive mimicry hypothesis in song-sharing song sparrows. *Animal Behaviour*, 62, 1197-1205.

Figure 2. The difference in aggression scores between best tutor and stranger trials for individual subjects depending on the proportion of songs they learned from their best tutor.

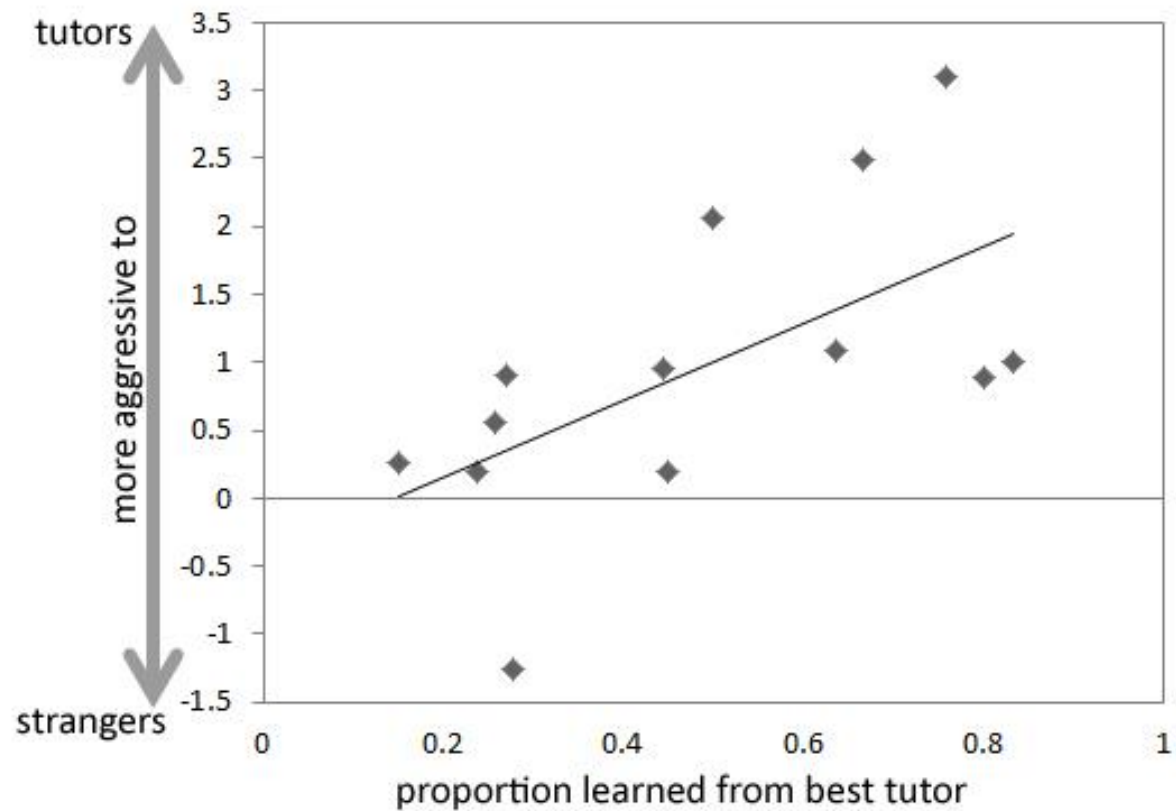

Source: http://biorxiv.org/content/10.1101/112516v1.full.pdf
